# Supplementary material
Source: PubMed Central journal article supplement (PMC7116019)

Funnel plot with subgroups

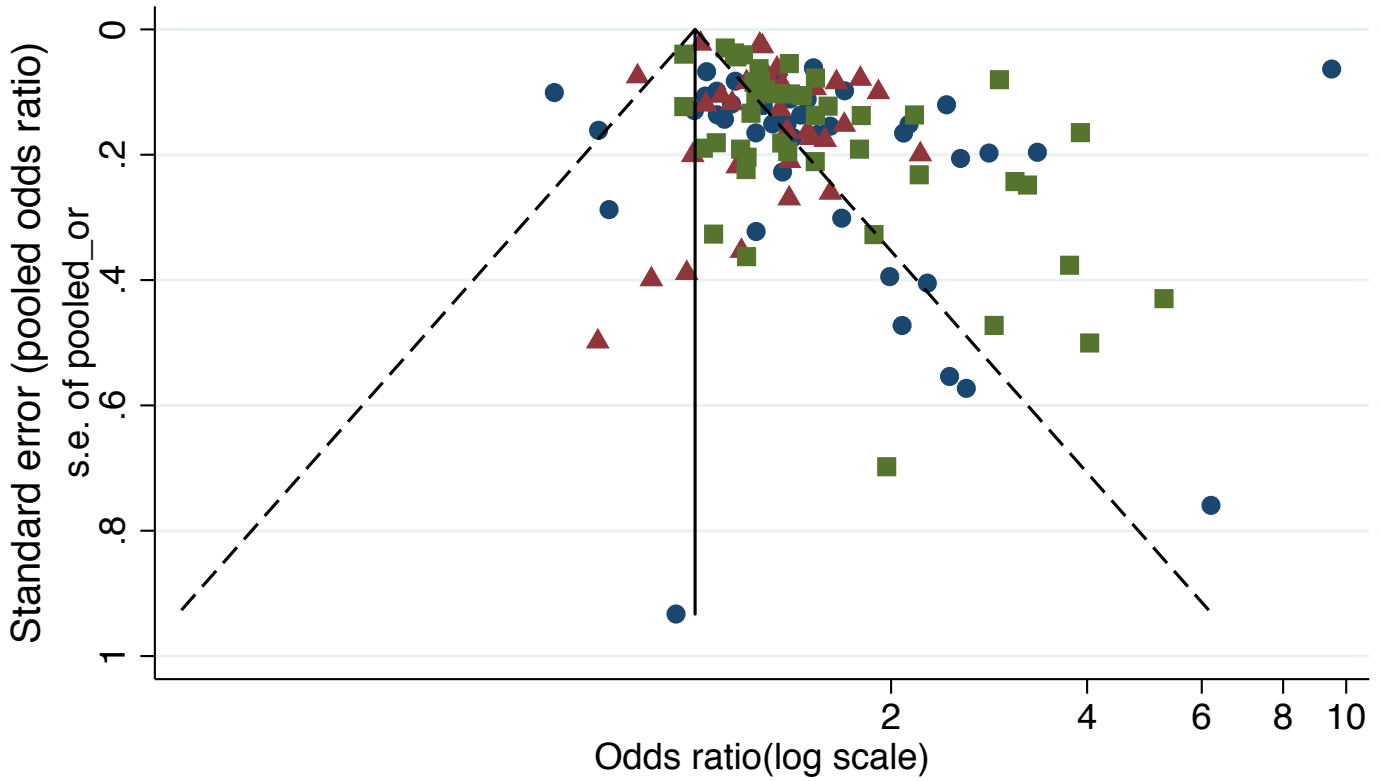

**A**

Funnel plot with subgroups

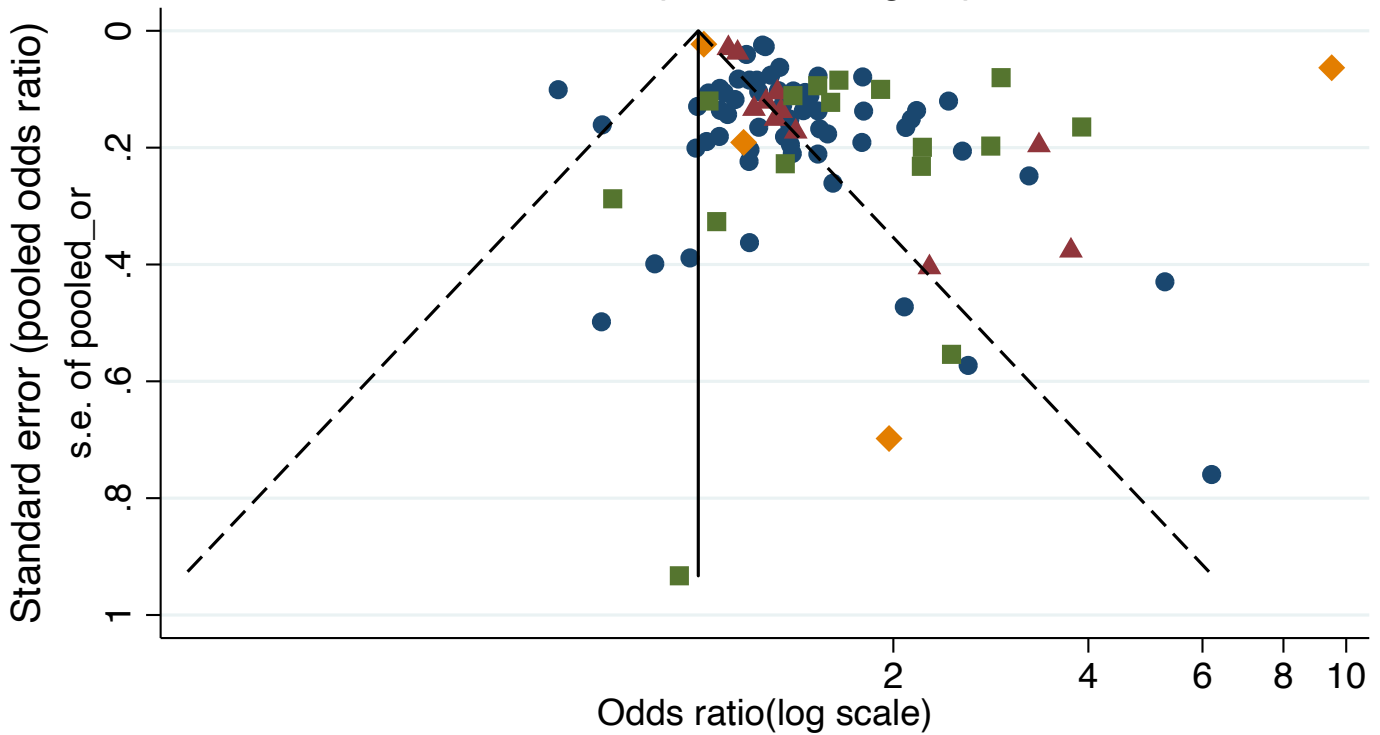

**B**

Supplement: EMS86777-supplement-App4.pdf [file EMS86777-supplement-App4.pdf]

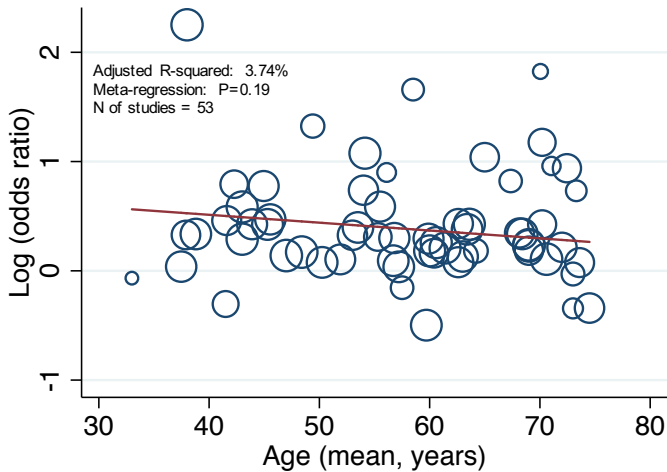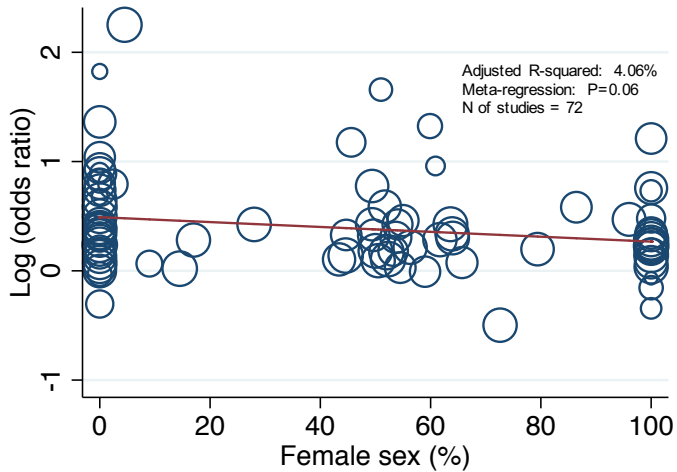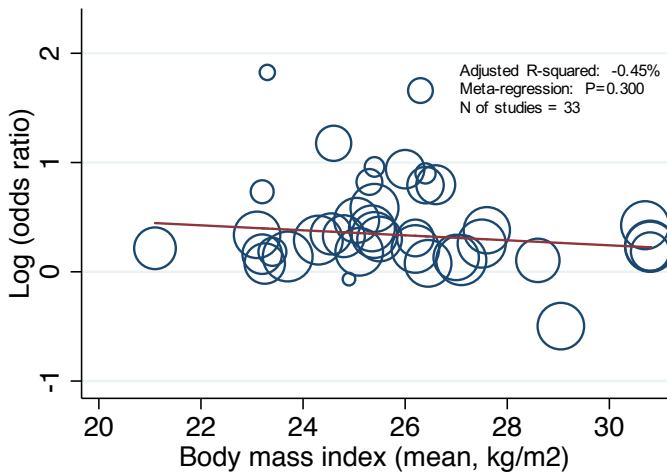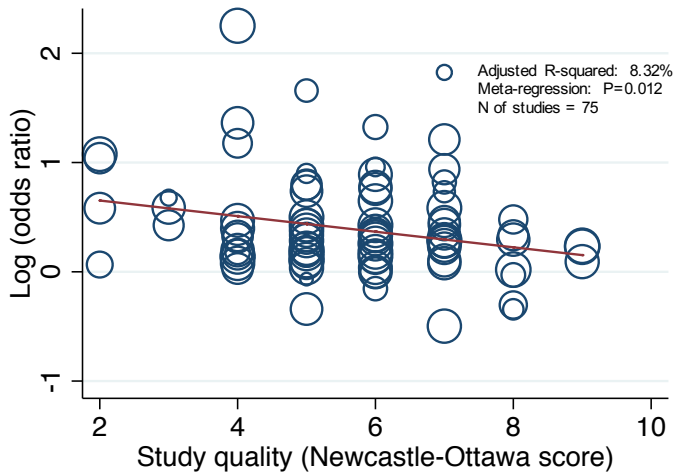

Supplement: EMS86777-supplement-App6.pdf [file EMS86777-supplement-App6.pdf]
